# Supplementary material for: The interplay of primer-template DNA phosphorylation status and single-stranded DNA binding proteins in directing clamp loaders to the appropriate polarity of DNA
Source: Oxford University Press journal article supplement (doi:10.1093/nar/gku774), 2014-08-26
Supplement: gku774_Supplementary_Data.zip [file gku774_Supplementary_Data.zip]

Archive with 1 entries (1 files):
- nar-01064-h-2014-File008.pdf
